# Supplementary material for: Exploration of a Novel Model of Intrusive Symptoms in Posttraumatic Stress Disorder Among US Veterans
Source: PubMed Central journal article supplement (PMC8938717; doi:10.1001/jamanetworkopen.2022.3555), 2022-03-21
Supplement: jamanetwopen-e223555-s001.pdf [file jamanetwopen-e223555-s001.pdf]

## Supplemental Online Content

Duek O, Spiller TR, Rubenstein A, Pietrzak RH, Harpaz-Rotem I. Exploration of a novel model of intrusive symptoms in posttraumatic stress disorder among US veterans. *JAMA Netw Open*. 2022;5(3):e223555. doi:10.1001/jamanetworkopen.2022.3555

**eTable.** Mappings of PTSD Checklist for *DSM-5* Items for *DSM-5*, 7-Factor, and 8-Factor Structural Models

This supplemental material has been provided by the authors to give readers additional information about their work.

**eTable.** Mappings of PTSD Checklist for *DSM-5* Items for *DSM-5*, 7-Factor, and 8-Factor Structural Models

| DSM-5        | 7-factor   | 8-factor      | Item No. |                                                                                                                                                                                                                                  |
|--------------|------------|---------------|----------|----------------------------------------------------------------------------------------------------------------------------------------------------------------------------------------------------------------------------------|
| <i>Int</i>   | <i>Int</i> | I- <i>Int</i> | 1        | Repeated, disturbing, and unwanted memories of the stressful experience                                                                                                                                                          |
| <i>Int</i>   | <i>Int</i> | I- <i>Int</i> | 2        | Repeated, disturbing dreams of the stressful experience                                                                                                                                                                          |
| <i>Int</i>   | <i>Int</i> | I- <i>Int</i> | 3        | Suddenly feeling or acting as if the stressful experience were actually happening again (as if you were actually back there reliving it)                                                                                         |
| <i>Int</i>   | <i>Int</i> | E- <i>Int</i> | 4        | Feeling very upset when something reminded you of the stressful experience                                                                                                                                                       |
| <i>Int</i>   | <i>Int</i> | E- <i>Int</i> | 5        | Having strong physical reactions when something reminded you of the stressful experience (for example, heart pounding, trouble breathing, sweating)                                                                              |
| <i>AV</i>    | <i>AV</i>  | <i>AV</i>     | 6        | Avoiding memories, thoughts, or feelings related to the stressful experience                                                                                                                                                     |
| <i>AV</i>    | <i>AV</i>  | <i>AV</i>     | 7        | Avoiding external reminders of the stressful experience (for example, people, places, conversations, activities, objects, or situations)                                                                                         |
| <i>NACM</i>  | <i>NA</i>  | <i>NA</i>     | 8        | Trouble remembering important parts of the stressful experience                                                                                                                                                                  |
| <i>NACM</i>  | <i>NA</i>  | <i>NA</i>     | 9        | Having strong negative beliefs about yourself, other people, or the world (for example, having thoughts such as: I am bad, there is something seriously wrong with me, no one can be trusted, the world is completely dangerous) |
| <i>NACM</i>  | <i>NA</i>  | <i>NA</i>     | 10       | Blaming yourself or someone else for the stressful experience or what happened after it                                                                                                                                          |
| <i>NACM</i>  | <i>NA</i>  | <i>NA</i>     | 11       | Having strong negative feelings such as fear, horror, anger, guilt, or shame                                                                                                                                                     |
| <i>NACM</i>  | <i>AN</i>  | <i>AN</i>     | 12       | Loss of interest in activities that you used to enjoy                                                                                                                                                                            |
| <i>NACM</i>  | <i>AN</i>  | <i>AN</i>     | 13       | Feeling distant or cut off from other people                                                                                                                                                                                     |
| <i>NACM</i>  | <i>AN</i>  | <i>AN</i>     | 14       | Trouble experiencing positive feelings (for example, being unable to feel happiness or have loving feelings for people close to you)                                                                                             |
| <i>Hyper</i> | <i>EB</i>  | <i>EB</i>     | 15       | Irritable behavior, angry outbursts, or acting aggressively                                                                                                                                                                      |
| <i>Hyper</i> | <i>EB</i>  | <i>EB</i>     | 16       | Taking too many risks or doing things that could cause you harm                                                                                                                                                                  |
| <i>Hyper</i> | <i>AA</i>  | <i>AA</i>     | 17       | Being “superalert” or watchful or on guard                                                                                                                                                                                       |
| <i>Hyper</i> | <i>AA</i>  | <i>AA</i>     | 18       | Feeling jumpy or easily startled                                                                                                                                                                                                 |
| <i>Hyper</i> | <i>DA</i>  | <i>DA</i>     | 19       | Having difficulty concentrating                                                                                                                                                                                                  |
| <i>Hyper</i> | <i>DA</i>  | <i>DA</i>     | 20       | Trouble falling or staying asleep                                                                                                                                                                                                |

**Abbreviations:** *Int*: Intrusion symptoms. *AV*: Avoidance. *NA*: Negative affect. *AN*: Anhedonia. *EB*: Externalizing behaviors. *AA*: Anxious arousal. *DA*: Dysphoric arousal. *NACM*: Negative alterations in cognitions and mood. *Hyper*: Alterations in arousal and reactivity. *I-Int*: Internally-generated intrusion symptoms. *E-Int*: Externally-generated intrusion symptoms.
